# Supplementary material
Source: MDPI journal article supplement (https://www.mdpi.com/2077-0472/13/2/400)
Supplement: s1 [file s1]

## Supplementary data

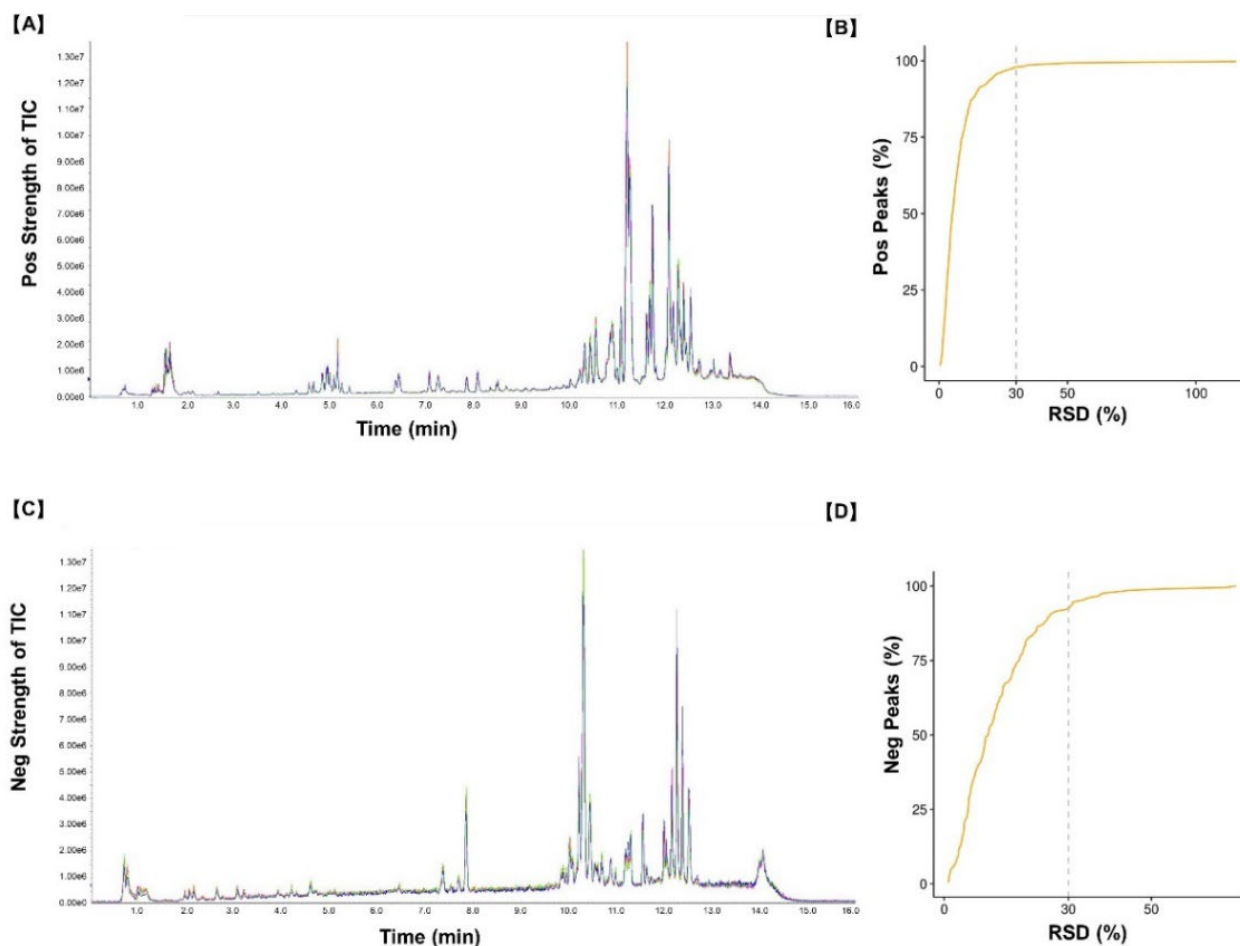

**Figure S1.** Data quality evaluation of instrument of QC. [A] Positive and [C] Negative sample total ion current (TIC) of QC. [B] Positive and [D] Negative sample relative standard deviation (RSD) of QC.

**Table S1.** Identified metabolites (624 metabolites were identified in total)

|   | ID       | Name                                                                                                                         | Superclass                      |
|---|----------|------------------------------------------------------------------------------------------------------------------------------|---------------------------------|
| 1 | POS_5857 | 10-Hydroxycamptothecin                                                                                                       | Alkaloids and derivatives       |
| 2 | POS_7446 | [1,14-Dihydroxy-8-(hydroxymethyl)-4,12,12,15-tetramethyl-5-oxo-13-tetracyclo[8.5.0.02,6.011,13]pentadeca-3,8-dienyl] acetate | Lipids and lipid-like molecules |
| 3 | POS_3991 | 11-(Phenylcarbonyl)-7,11-diazatricyclo[7.3.1.0<2,7>]trideca-2,4-dien-6-one                                                   | Organoheterocyclic compounds    |
| 4 | POS_5143 | 12,19,20-Trihydroxy-14-methylenegeranylnerol                                                                                 | Undefined                       |

|    |           |                                                                                                                                                                                                            |                                         |
|----|-----------|------------------------------------------------------------------------------------------------------------------------------------------------------------------------------------------------------------|-----------------------------------------|
| 5  | POS_1389  | 1-(2-Chlorophenyl)piperazine                                                                                                                                                                               | Organoheterocyclic compounds            |
| 6  | POS_12445 | 1,2-Dipalmitoylphosphatidylcholine                                                                                                                                                                         | Lipids and lipid-like molecules         |
| 7  | POS_4493  | (12Z)-9,10-Dihydroxyoctadec-12-enoic acid                                                                                                                                                                  | Lipids and lipid-like molecules         |
| 8  | POS_6662  | [1,3-Dihydroxy-1-(7-methoxy-2-oxochromen-6-yl)-3-methylbutan-2-yl] (E)-2-methylbut-2-enoate                                                                                                                | Phenylpropanoids and polyketides        |
| 9  | POS_1641  | 1,3-Diphenylguanidine                                                                                                                                                                                      | Benzenoids                              |
| 10 | POS_7382  | 13'-Hydroxy-alpha-tocopherol                                                                                                                                                                               | Undefined                               |
| 11 | POS_253   | 1,4-Cyclohexanedione                                                                                                                                                                                       | Organic oxygen compounds                |
| 12 | POS_5482  | 1-(4-Hydroxyphenyl)-3-[(2R,3R,4S,5S,6R)-3,4,5-trihydroxy-6-(hydroxymethyl)oxan-2-yl]oxypropan-1-one                                                                                                        | Lipids and lipid-like molecules         |
| 13 | POS_2965  | 1,9-Heptadecadiene-4,6-diyne-3,8-diol                                                                                                                                                                      | Lipids and lipid-like molecules         |
| 14 | POS_1012  | 1-(Aminomethyl)cyclohexaneacetate                                                                                                                                                                          | Organic acids and derivatives           |
| 15 | POS_1481  | 1-Decanamine, N,N-dimethyl-, N-oxide                                                                                                                                                                       | Organic nitrogen compounds              |
| 16 | POS_9130  | 1-Heptadecanoyl-sn-glycero-3-phosphocholine                                                                                                                                                                | Lipids and lipid-like molecules         |
| 17 | POS_7980  | 1-Hexadecanoyl-sn-glycero-3-phosphoethanolamine                                                                                                                                                            | Lipids and lipid-like molecules         |
| 18 | POS_497   | 1-Methylnicotinamide                                                                                                                                                                                       | Organoheterocyclic compounds            |
| 19 | POS_569   | 1-Naphthylamine                                                                                                                                                                                            | Benzenoids                              |
| 20 | POS_12045 | 1-O-[(2alpha,3beta,5xi,6beta,9xi,18xi,19alpha)-2,3,6,19,23-pentahydroxy-28-oxoolean-12-en-28-yl]-beta-D-glucopyranose                                                                                      | Lipids and lipid-like molecules         |
| 21 | POS_9572  | 1-O-linoleoyl-3-O-beta-D-galactopyranosyl-syn-glycerol                                                                                                                                                     | Undefined                               |
| 22 | POS_8592  | 1-Pentadecanoyl-sn-glycero-3-phosphocholine                                                                                                                                                                | Lipids and lipid-like molecules         |
| 23 | POS_8329  | [(1S,5R)-6,6-Dimethylbicyclo[3.1.1]hept-2-en-2-yl]methyl 6-O-alpha-L-arabinopyranosyl-beta-D-glucopyranoside                                                                                               | Lipids and lipid-like molecules         |
| 24 | POS_9395  | 1-Stearoyl-sn-glycero-3-phosphocholine                                                                                                                                                                     | Lipids and lipid-like molecules         |
| 25 | POS_4597  | 1-(Tert-butylamino)-3-{[4-(morpholin-4-yl)-1,2,5-thiadiazol-3-yl]oxy}propan-2-ol                                                                                                                           | Organic nitrogen compounds              |
| 26 | POS_2907  | 1-Tetradecanamine, N,N-dimethyl-, N-oxide                                                                                                                                                                  | Organic nitrogen compounds              |
| 27 | POS_750   | 2,2,6,6-Tetramethyl-4-piperidone                                                                                                                                                                           | Organoheterocyclic compounds            |
| 28 | POS_888   | 2-(2-Butoxyethoxy)ethanol                                                                                                                                                                                  | Organic oxygen compounds                |
| 29 | POS_3041  | 2',2'-Difluorodeoxyuridine                                                                                                                                                                                 | Nucleosides, nucleotides, and analogues |
| 30 | POS_589   | 2,2-Dimethylsuccinic acid                                                                                                                                                                                  | Lipids and lipid-like molecules         |
| 31 | POS_7702  | 22-Hydroxy-6-hopanone                                                                                                                                                                                      | Lipids and lipid-like molecules         |
| 32 | POS_9539  | 2-[(2R,4As,8S,8aS)-8-[2-[(4aS,7R,8aR)-7-(1-carboxyethenyl)-1-hydroxy-4a-methyl-2-oxo-6,7,8,8a-tetrahydro-5H-naphthalen-1-yl]ethyl]-4a-methyl-7-oxo-1,2,3,4,8,8a-hexahydronaphthalen-2-yl]prop-2-enoic acid | Lipids and lipid-like molecules         |
| 33 | POS_8328  | 2-[[3,4-Dihydroxy-4-(hydroxymethyl)oxolan-2-                                                                                                                                                               | Lipids and lipid-like molecules         |

|    |           |                                                                                                                                           |                                           |
|----|-----------|-------------------------------------------------------------------------------------------------------------------------------------------|-------------------------------------------|
|    |           | yl]oxymethyl]-6-[(6,6-dimethyl-4-bicyclo[3.1.1]hept-3-enyl)methoxy]oxane-3,4,5-triol                                                      |                                           |
| 34 | POS_6719  | [2,3-Dihydroxy-1-(7-methoxy-2-oxochromen-6-yl)-3-methylbutyl] 3-methylbutanoate                                                           | Phenylpropanoids and polyketides          |
| 35 | POS_3731  | 2,3-Dihydroxypropyl tetradecanoate                                                                                                        | Lipids and lipid-like molecules           |
| 36 | POS_4501  | 2,4-Dihydroxyheptadecyl acetate                                                                                                           | Lipids and lipid-like molecules           |
| 37 | POS_5481  | 2',5,6-Trimethoxyflavone                                                                                                                  | Phenylpropanoids and polyketides          |
| 38 | POS_5547  | (2,6,6-Trimethyl-4-oxo-2-cyclohexen-1-yl)methyl beta-D-glucopyranoside                                                                    | Organic oxygen compounds                  |
| 39 | POS_3110  | 2-(6-Aminopurin-9-yl)-5-(hydroxymethyl)oxolane-3,4-diol                                                                                   | Nucleosides, nucleotides, and analogues   |
| 40 | POS_322   | 2,6-Dimethylaniline                                                                                                                       | Benzenoids                                |
| 41 | POS_1562  | 2,6-DI-Tert-butylphenol                                                                                                                   | Benzenoids                                |
| 42 | POS_7250  | 2-{[6-O-(6-Deoxy-alpha-L-mannopyranosyl)-beta-D-glucopyranosyl]oxy}-3-methylbutanenitrile                                                 | Organic oxygen compounds                  |
| 43 | POS_6966  | 2-Acetoxy-4-pentadecylbenzoic acid                                                                                                        | Benzenoids                                |
| 44 | POS_4632  | 2-Aminooctadecane-1,3,4-triol                                                                                                             | Organic nitrogen compounds                |
| 45 | POS_2013  | 2'-Deoxycytidine                                                                                                                          | Nucleosides, nucleotides, and analogues   |
| 46 | POS_4681  | [2-[(E)-3,4-Dihydroxypent-1-enyl]-6-oxooxan-3-yl] (E)-2-methylbut-2-enoate                                                                | Organoheterocyclic compounds              |
| 47 | POS_2728  | (2E,4E)-N-(2-Methylpropyl)dodeca-2,4-dienamide                                                                                            | Lipids and lipid-like molecules           |
| 48 | POS_9758  | 2-(Hydroxymethyl)-6-[5-[3-(hydroxymethyl)-5-(3-hydroxypropyl)-7-methoxy-2,3-dihydro-1-benzofuran-2-yl]-2-methoxyphenoxy]oxane-3,4,5-triol | Phenylpropanoids and polyketides          |
| 49 | POS_5609  | 2-(Hydroxymethyl)-6-(6-hydroxy-6-methyl-3-propan-2-ylcyclohex-3-en-1-yl)oxyoxane-3,4,5-triol                                              | Lipids and lipid-like molecules           |
| 50 | POS_5832  | 2-Methoxy-4-pentadecylbenzoic acid                                                                                                        | Benzenoids                                |
| 51 | POS_10280 | 2-Methoxy-4-[tetrahydro-3a,6a-dihydroxy-4-(4-hydroxy-3-methoxyphenyl)-1H,3H-furo[3,4-c]furan-1-yl]phenyl-beta-D-glucopyranoside           | Lignans, neolignans and related compounds |
| 52 | POS_4207  | 2-Monomyristin                                                                                                                            | Lipids and lipid-like molecules           |
| 53 | POS_4978  | 2-Palmitoylglycerol                                                                                                                       | Lipids and lipid-like molecules           |
| 54 | POS_1791  | 2-Phenyl-2-piperidin-1-ium-2-ylacetate                                                                                                    | Organic nitrogen compounds                |
| 55 | POS_486   | 2-Phenylacetamide                                                                                                                         | Benzenoids                                |
| 56 | POS_2893  | 2-(((R)-2,3-Dihydroxypropyl)phosphoryloxy)-N,N,N-trimethylethanaminium                                                                    | Lipids and lipid-like molecules           |
| 57 | POS_12640 | (2R,3S,4R,5R,8R,10R,11R,13S,14R)-11-[(2S,3R,4S,6R)-4-(Dimethylamino)-3-hydroxy-6-                                                         | Organic oxygen compounds                  |

|    |           |                                                                                                                                                                              |                                         |
|----|-----------|------------------------------------------------------------------------------------------------------------------------------------------------------------------------------|-----------------------------------------|
|    |           | methyloxan-2-yl]oxy-2-ethyl-3,4,10-trihydroxy-13-[(2R,4R,5S,6S)-5-hydroxy-4-methoxy-4,6-dimethyloxan-2-yl]oxy-3,5,6,8,10,12,14-heptamethyl-1-oxa-6-azacyclopentadecan-15-one |                                         |
| 58 | POS_8605  | (2R,3S,4S,5R,6R)-2-[[[(2S,3R,4R)-3,4-dihydroxy-4-(hydroxymethyl)oxolan-2-yl]oxymethyl]-6-[4-(4-hydroxyphenyl)butan-2-yloxy]oxane-3,4,5-triol                                 | Lipids and lipid-like molecules         |
| 59 | POS_5608  | (2R,3S,4S,5R,6S)-2-(hydroxymethyl)-6-[4-(hydroxymethyl)-1-propan-2-ylcyclohex-3-en-1-yl]oxyoxane-3,4,5-triol                                                                 | Lipids and lipid-like molecules         |
| 60 | POS_5511  | (2R,3S,5R)-2-[6-[[[(1S,2S)-2-Hydroxycyclopentyl]amino]-9-purinyl]-5-(hydroxymethyl)oxolane-3,4-diol                                                                          | Nucleosides, nucleotides, and analogues |
| 61 | POS_4193  | 3,3',4',5,5',7-Hexahydroxyflavylium                                                                                                                                          | Phenylpropanoids and polyketides        |
| 62 | POS_3892  | 3-(3,4-Dimethoxyphenyl)-2-methyl-6-methylaminohexane-3-carbonitrile                                                                                                          | Benzenoids                              |
| 63 | POS_6065  | 3,4-Dihydro-6,8-dihydroxy-3-(10-hydroxyundecyl)isocoumarin                                                                                                                   | Benzenoids                              |
| 64 | POS_5544  | 3-(4-Hydroxyphenyl)propanoic acid 3-(4-hydroxy-3-methoxyphenyl)propyl ester                                                                                                  | Benzenoids                              |
| 65 | POS_6617  | 3,5,5-Trimethyl-4-[3-[(beta-D-glucopyranosyl)oxy]butyl]-3-cyclohexen-1-ol                                                                                                    | Lipids and lipid-like molecules         |
| 66 | POS_7129  | 3-[5,7-Dihydroxy-4-(4-hydroxyphenyl)-2-oxo-3,4-dihydrochromen-3-yl]-5,6,7,8-tetrahydroxy-4-(4-hydroxyphenyl)-3,4-dihydrochromen-2-one                                        | Phenylpropanoids and polyketides        |
| 67 | POS_3880  | 3,6-Diphenylcyclohexan-1,2-diol                                                                                                                                              | Organic oxygen compounds                |
| 68 | POS_10263 | 3-{7-[5-(1-hydroxyhenicosa-4,8-dien-1-yl)oxolan-2-yl]heptyl}-5-methyl-5H-furan-2-one                                                                                         |                                         |
| 69 | POS_6670  | 3-[(Acetyloxy)methyl]-5-[(1R,4aR,8aR)-decahydro-5,5,8a-trimethyl-2-methylene-1-naphthalenyl]-, methyl ester, (2Z)-2-pentenoic acid                                           | Lipids and lipid-like molecules         |
| 70 | POS_3958  | 3alpha,17beta-Dihydroxy-5alpha-androstane                                                                                                                                    | Lipids and lipid-like molecules         |
| 71 | POS_9584  | 3-Deoxo-3-beta-Acetoxydeoxydihydrogedunin                                                                                                                                    | Organoheterocyclic compounds            |
| 72 | POS_8182  | 3-Ethyl-4-hydroxy-4-methylpentyl 6-O-[(2S,3R,4R)-tetrahydro-3,4-dihydroxy-4-(hydroxymethyl)-2-furanyl]-beta-D-glucopyranoside                                                | Lipids and lipid-like molecules         |
| 73 | POS_7995  | [3-Hydroxy-1-(4-methoxy-7-oxofuro[3,2-g]chromen-9-yl)oxy-3-methylbutan-2-yl] (E)-2-methylbut-2-enoate                                                                        | Phenylpropanoids and polyketides        |
| 74 | POS_8225  | 3-Hydroxy-3-(hydroxymethyl)-4-methylpentyl 6-O-[(2S,3R,4R)-3,4-dihydroxy-4-                                                                                                  | Lipids and lipid-like molecules         |

|    |          |                                                                                                                                  |                                           |
|----|----------|----------------------------------------------------------------------------------------------------------------------------------|-------------------------------------------|
|    |          | (hydroxymethyl)tetrahydro-2-furanyl]-beta-D-glucopyranoside                                                                      |                                           |
| 75 | POS_1125 | 3-Methoxycinnamic acid                                                                                                           | Phenylpropanoids and polyketides          |
| 76 | POS_5367 | 3-(Toluene-4-sulfonyl)-1,2,3,4,5,6-hexahydro-1,5-methano-pyrido[1,2-a][1,5]diazocin-8-one                                        | Alkaloids and derivatives                 |
| 77 | POS_6864 | 4-(1,3-Benzodioxol-5-ylmethyl)-3-[(3,4-dimethoxyphenyl)methyl]oxolan-2-one                                                       | Lignans, neolignans and related compounds |
| 78 | POS_7520 | 4-[(2R,3R,4S,5S,6R)-3,4,5-trihydroxy-6-(hydroxymethyl)oxan-2-yl]oxypentan-2-yl (E)-3-(4-hydroxyphenyl)prop-2-enoate              | Lipids and lipid-like molecules           |
| 79 | POS_6922 | 4-[3-(Beta-D-glucopyranosyloxy)-4-hydroxy-2,6,6-trimethyl-1-cyclohexen-1-yl]-2-butanone                                          | Lipids and lipid-like molecules           |
| 80 | POS_9406 | 4,4,8,10,14-Pentamethyl-17-(4,5,6-trihydroxy-6-methylheptan-2-yl)-2,5,6,7,9,15-hexahydro-1H-cyclopenta[a]phenanthrene-3,16-dione | Lipids and lipid-like molecules           |
| 81 | POS_8517 | 4-[5-[[4-[5-[Acetyl(hydroxy)amino]pentylamino]-4-oxobutanoyl]-hydroxyamino]pentylamino]-4-oxobutanoic acid                       | Lipids and lipid-like molecules           |
| 82 | POS_5620 | [4,6-diethyl-6-(4-ethyl-2-methyloctyl)-3H-1,2-dioxin-3-yl]acetic acid                                                            | Undefined                                 |
| 83 | POS_602  | 4-Acetamidobutyric acid                                                                                                          | Organic acids and derivatives             |
| 84 | POS_4200 | 4-[Formyl(6-methoxyquinolin-8-yl)amino]pentanoic acid                                                                            | Organoheterocyclic compounds              |
| 85 | POS_1479 | 4-Hydroxy-1-(2-hydroxyethyl)-2,2,6,6-tetramethylpiperidine                                                                       | Organoheterocyclic compounds              |
| 86 | POS_1880 | 4-Hydroxybenzoylcholine                                                                                                          | Benzenoids                                |
| 87 | POS_7889 | 4'-Methoxyflavone                                                                                                                | Phenylpropanoids and polyketides          |
| 88 | POS_8403 | 4''-Methylepigallocatechin gallate                                                                                               | Phenylpropanoids and polyketides          |
| 89 | POS_7996 | 5-(1-benzofuran-2-yl)-N,N-dimethyl-2-[4-(piperazin-1-yl)phenyl]-1,3-thiazole-4-carboxamide                                       | Organoheterocyclic compounds              |
| 90 | POS_5008 | 5-[(1S,4aS,8aS)-Decahydro-5,5,8a-trimethyl-2-methylene-1-naphthalenyl]-3-methyl-, (2E)-2-penten-1-ol                             | Lipids and lipid-like molecules           |
| 91 | POS_2303 | 5-Cyclohexadecen-1-one                                                                                                           | Organic oxygen compounds                  |
| 92 | POS_4067 | 5'-Deoxy-5'-methylthioadenosine                                                                                                  | Nucleosides, nucleotides, and analogues   |
| 93 | POS_3022 | 5-dodecyl-4-hydroxy-4-methylcyclopent-2-en-1-one                                                                                 | Undefined                                 |
| 94 | POS_8079 | 5-Hydroxy-7-[4-hydroxy-2-methoxy-3-(3-methylbut-2-enyl)phenyl]-2,2-dimethyl-7,8-dihydropyrano[3,2-g]chromen-6-one                | Phenylpropanoids and polyketides          |
| 95 | POS_3082 | 5-Methyl-7-methoxyisoflavone                                                                                                     | Undefined                                 |
| 96 | POS_2892 | 5-Methylcytidine                                                                                                                 | Nucleosides, nucleotides, and analogues   |

|     |           |                                                                                                                        |                                           |
|-----|-----------|------------------------------------------------------------------------------------------------------------------------|-------------------------------------------|
| 97  | POS_7037  | 6-[3-[(3,4-Dimethoxyphenyl)methyl]-4-methoxy-2-(methoxymethyl)butyl]-4-methoxy-1,3-benzodioxole                        | Lignans, neolignans and related compounds |
| 98  | POS_6634  | 6-{9a,11a-dimethyl-1H,2H,3H,3aH,3bH,4H,8H,9H,9bH,10H,11H-cyclopenta[a]phenanthren-1-yl}-3-ethyl-2-methylheptane        | Undefined                                 |
| 99  | POS_7321  | (6beta,22E)-6-Hydroxystigmasta-4,22-dien-3-one                                                                         | Undefined                                 |
| 100 | POS_7948  | 6-(beta-D-Glucopyranosyloxy)-4,5,6,7,8,8a-hexahydro-5-hydroxy-5-(1-hydroxy-1-methylethyl)-3,8-dimethyl-2(1H)-azulenone | Lipids and lipid-like molecules           |
| 101 | POS_2791  | 7,2'-Dihydroxyflavone                                                                                                  | Phenylpropanoids and polyketides          |
| 102 | POS_7213  | 7alpha-Hydroxy-4-cholesten-3-one                                                                                       | Lipids and lipid-like molecules           |
| 103 | POS_5859  | (7E,13E)-9,15-Dihydroxy-4,10,16-trimethyl-1,5,11-trioxacyclohexadeca-7,13-diene-2,6,12-trione                          | Phenylpropanoids and polyketides          |
| 104 | POS_2957  | 7-Hydroxyflavone                                                                                                       | Phenylpropanoids and polyketides          |
| 105 | POS_6730  | 7-Ketocholesterol                                                                                                      | Lipids and lipid-like molecules           |
| 106 | POS_7240  | 8-(2,3-Dihydroxy-3-methylbutyl)-5,7-dimethoxy-2-phenyl-2,3-dihydrochromen-4-one                                        | Phenylpropanoids and polyketides          |
| 107 | POS_4602  | 8-(2,6-Diethyl-4-methylphenyl)tetrahydropyrazolo(1,2-d)(1,4,5)oxadiazepine-7,9-dione                                   | Benzenoids                                |
| 108 | POS_6666  | 8-Hydroxy-2,7,7,11,15-pentamethyl-5,12,16-trioxapentacyclo[9.8.0.0(2),.0,.0(1)(3),(1)]nonadec-13(18)-ene-3,17-dione    | Organoheterocyclic compounds              |
| 109 | POS_5141  | 8-Hydroxy-9,10-epoxystearic acid                                                                                       | Lipids and lipid-like molecules           |
| 110 | POS_5250  | 8-Prenylnaringenin                                                                                                     | Phenylpropanoids and polyketides          |
| 111 | POS_4008  | 9-Oxo-octadeca-10,12-dienoic acid                                                                                      | Lipids and lipid-like molecules           |
| 112 | POS_693   | Acenaphthylene                                                                                                         | Benzenoids                                |
| 113 | POS_1503  | Acetyl-d-carnitine                                                                                                     | Lipids and lipid-like molecules           |
| 114 | POS_7309  | Acetyl-Leu-Leu-Arg-al                                                                                                  | Organic acids and derivatives             |
| 115 | POS_1378  | Acridinone                                                                                                             | Organoheterocyclic compounds              |
| 116 | POS_1490  | Ala-Ile                                                                                                                | Organic acids and derivatives             |
| 117 | POS_9192  | Alisol A                                                                                                               | Lipids and lipid-like molecules           |
| 118 | POS_10542 | Alkergot                                                                                                               | Alkaloids and derivatives                 |
| 119 | POS_9903  | (all-E)-beta-Cryptoxanthin                                                                                             | Lipids and lipid-like molecules           |
| 120 | POS_489   | Allopurinol                                                                                                            | Organoheterocyclic compounds              |
| 121 | POS_3244  | alpha-Naphthoflavone                                                                                                   | Phenylpropanoids and polyketides          |
| 122 | POS_7997  | Amethopterin                                                                                                           | Organoheterocyclic compounds              |
| 123 | POS_3055  | Ammothamnine                                                                                                           | Undefined                                 |
| 124 | POS_5549  | Anileridine                                                                                                            | Organoheterocyclic compounds              |
| 125 | POS_120   | Aniline                                                                                                                | Benzenoids                                |

|     |           |                                 |                                         |
|-----|-----------|---------------------------------|-----------------------------------------|
| 126 | POS_10472 | Anthranoyllycoctonine           | Lipids and lipid-like molecules         |
| 127 | POS_1081  | Arginine                        | Organic acids and derivatives           |
| 128 | POS_8346  | Aspergamid B                    | Organoheterocyclic compounds            |
| 129 | POS_8361  | Astragalin                      | Phenylpropanoids and polyketides        |
| 130 | POS_12340 | Atazanavir                      | Organic acids and derivatives           |
| 131 | POS_4423  | Avocadene 2-acetate             | Lipids and lipid-like molecules         |
| 132 | POS_4479  | Benzyl butyl phthalate          | Benzenoids                              |
| 133 | POS_3926  | Benzylidiphenylphosphine oxide  | Benzenoids                              |
| 134 | POS_7324  | beta-Amyrin                     | Lipids and lipid-like molecules         |
| 135 | POS_285   | Betaine                         | Organic acids and derivatives           |
| 136 | POS_7416  | Bidwillon A                     | Phenylpropanoids and polyketides        |
| 137 | POS_2054  | Bisphenol A                     | Benzenoids                              |
| 138 | POS_6563  | Brucine                         | Alkaloids and derivatives               |
| 139 | POS_8906  | Bryodulcosigenin                | Lipids and lipid-like molecules         |
| 140 | POS_6876  | Bufalin                         | Lipids and lipid-like molecules         |
| 141 | POS_5356  | Bullatine A                     | Undefined                               |
| 142 | POS_3846  | Bupivacaine                     | Organic acids and derivatives           |
| 143 | POS_1154  | Caffeic acid                    | Phenylpropanoids and polyketides        |
| 144 | POS_1344  | Caffeine                        | Organoheterocyclic compounds            |
| 145 | POS_5451  | Camptothecin                    | Alkaloids and derivatives               |
| 146 | POS_1298  | Carbendazim                     | Organic acids and derivatives           |
| 147 | POS_7684  | (-)-Catechin gallate            | Phenylpropanoids and polyketides        |
| 148 | POS_9366  | Catechin pentaacetate           | Phenylpropanoids and polyketides        |
| 149 | POS_9578  | Cer 34:3;2O Cer 18:2;2O/16:1    | Undefined                               |
| 150 | POS_9470  | Chaetoglobosin C                | Alkaloids and derivatives               |
| 151 | POS_13838 | Chlorophyll b from Chlorella    | Organoheterocyclic compounds            |
| 152 | POS_6319  | Cholest-4,6-Dien-3-One          | Lipids and lipid-like molecules         |
| 153 | POS_6875  | Cholic acid                     | Lipids and lipid-like molecules         |
| 154 | POS_180   | Choline                         | Organic nitrogen compounds              |
| 155 | POS_4298  | Cimifugin                       | Organoheterocyclic compounds            |
| 156 | POS_5127  | Cirsimaritin                    | Phenylpropanoids and polyketides        |
| 157 | POS_4132  | Clobazam                        | Organoheterocyclic compounds            |
| 158 | POS_4861  | Clozapine                       | Organic oxygen compounds                |
| 159 | POS_399   | Coniine                         | Alkaloids and derivatives               |
| 160 | POS_2720  | Cordycepin                      | Nucleosides, nucleotides, and analogues |
| 161 | POS_3685  | Crotonoside                     | Nucleosides, nucleotides, and analogues |
| 162 | POS_9664  | Cucurbitacin D                  | Lipids and lipid-like molecules         |
| 163 | POS_7831  | Cyanidin-3-O-glucoside chloride | Undefined                               |
| 164 | POS_4955  | Cyclic AMP                      | Nucleosides, nucleotides, and analogues |
| 165 | POS_729   | Cyclo-prolylglycine             | Organic acids and derivatives           |
| 166 | POS_6516  | Cylindrol B                     | Organic oxygen compounds                |
| 167 | POS_7830  | Cynaroside                      | Undefined                               |
| 168 | POS_1926  | Cyprodinil                      | Benzenoids                              |

|     |           |                                                                                    |                                         |
|-----|-----------|------------------------------------------------------------------------------------|-----------------------------------------|
| 169 | POS_2531  | Cytidine                                                                           | Nucleosides, nucleotides, and analogues |
| 170 | POS_8575  | Decaethylene glycol                                                                | Organic oxygen compounds                |
| 171 | POS_1249  | Deethylatrazine                                                                    | Organoheterocyclic compounds            |
| 172 | POS_4172  | Dehydroevodiamine                                                                  | Organoheterocyclic compounds            |
| 173 | POS_4705  | Dehydrohistidyltryptophyldiketopiperazine                                          | Organic acids and derivatives           |
| 174 | POS_10444 | Dehydroxynocardamine                                                               | Phenylpropanoids and polyketides        |
| 175 | POS_4555  | delta9-Tetrahydrocannabinol                                                        | Organoheterocyclic compounds            |
| 176 | POS_11202 | Demethoxycentaureidin 7-O-rutinoside                                               | Phenylpropanoids and polyketides        |
| 177 | POS_10560 | Deoxykhivorin                                                                      | Organoheterocyclic compounds            |
| 178 | POS_1556  | Dexibuprofen                                                                       | Phenylpropanoids and polyketides        |
| 179 | POS_10676 | DG(18:2(9Z,12Z)/18:2(9Z,12Z))                                                      | Undefined                               |
| 180 | POS_11129 | DG 36:5 DG 18:2_18:3                                                               | Undefined                               |
| 181 | POS_11104 | DG 36:6 DG 18:3_18:3                                                               | Undefined                               |
| 182 | POS_1155  | D(+)-Glucose                                                                       | Organic oxygen compounds                |
| 183 | POS_3424  | Dibutyl phthalate                                                                  | Benzenoids                              |
| 184 | POS_1178  | Dicyclohexylamine                                                                  | Organic nitrogen compounds              |
| 185 | POS_1853  | Diethyl phthalate                                                                  | Benzenoids                              |
| 186 | POS_1315  | Diethyltoluamide                                                                   | Benzenoids                              |
| 187 | POS_940   | Dihydrojasnone                                                                     | Undefined                               |
| 188 | POS_4489  | Dihydroxyoctadecadienoic acid                                                      | Lipids and lipid-like molecules         |
| 189 | POS_2481  | Diocetylamine                                                                      | Organic nitrogen compounds              |
| 190 | POS_6477  | Diocetyl phthalate                                                                 | Benzenoids                              |
| 191 | POS_11105 | Diosmetin-7-O-rutinoside                                                           | Phenylpropanoids and polyketides        |
| 192 | POS_2680  | Diphenyl phosphate                                                                 | Organic acids and derivatives           |
| 193 | POS_4039  | Disulfiram                                                                         | Organic nitrogen compounds              |
| 194 | POS_443   | DL-Isoleucine                                                                      | Organic acids and derivatives           |
| 195 | POS_4626  | Drofenine                                                                          | Benzenoids                              |
| 196 | POS_7298  | (E)-3-[3-Methoxy-4-[1-(3,4,5-trimethoxyphenyl)propan-2-yloxy]phenyl]prop-2-en-1-ol | Phenylpropanoids and polyketides        |
| 197 | POS_9002  | Ecdysterone                                                                        | Lipids and lipid-like molecules         |
| 198 | POS_9872  | Echinenone                                                                         | Lipids and lipid-like molecules         |
| 199 | POS_10545 | Edpetiline                                                                         | Undefined                               |
| 200 | POS_11492 | Enniatin B                                                                         | Organic acids and derivatives           |
| 201 | POS_3875  | Epicatechin                                                                        | Phenylpropanoids and polyketides        |
| 202 | POS_4296  | Epigallocatechin                                                                   | Phenylpropanoids and polyketides        |
| 203 | POS_4566  | (E)-Piperolein A                                                                   | Organoheterocyclic compounds            |
| 204 | POS_10305 | Ergocryptinine                                                                     | Alkaloids and derivatives               |
| 205 | POS_5185  | Erucamide                                                                          | Lipids and lipid-like molecules         |
| 206 | POS_1335  | Ethyl-4-dimethylaminobenzoate                                                      | Benzenoids                              |
| 207 | POS_6683  | Fecosterol                                                                         | Undefined                               |
| 208 | POS_4244  | Fenpropimorph                                                                      | Benzenoids                              |
| 209 | POS_3771  | Fisetin                                                                            | Phenylpropanoids and polyketides        |



|     |           |                                      |                                         |
|-----|-----------|--------------------------------------|-----------------------------------------|
| 210 | POS_4519  | Flubendazole                         | Benzenoids                              |
| 211 | POS_5603  | Flumioxazin                          | Organoheterocyclic compounds            |
| 212 | POS_928   | Fluorene                             | Benzenoids                              |
| 213 | POS_7480  | Forskolin                            | Lipids and lipid-like molecules         |
| 214 | POS_1484  | Fructose (Generic Ketohexose)        | Organic oxygen compounds                |
| 215 | POS_6584  | Fucosterol                           | Lipids and lipid-like molecules         |
| 216 | POS_3256  | Galaxolidone                         | Organoheterocyclic compounds            |
| 217 | POS_4726  | Gelsemine                            | Alkaloids and derivatives               |
| 218 | POS_6042  | Gentian violet cation                | Benzenoids                              |
| 219 | POS_7634  | Ginkgolide C                         | Undefined                               |
| 220 | POS_13062 | Ginsenoside Rk1                      | Undefined                               |
| 221 | POS_5128  | Glabrone                             | Phenylpropanoids and polyketides        |
| 222 | POS_622   | Glutamic acid                        | Organic acids and derivatives           |
| 223 | POS_614   | Glutamine Analogue, 1                | Organic acids and derivatives           |
| 224 | POS_5658  | Glyceryl monooleate                  | Lipids and lipid-like molecules         |
| 225 | POS_5717  | Glyceryl monostearate                | Lipids and lipid-like molecules         |
| 226 | POS_5436  | Glyceryl palmitate                   | Lipids and lipid-like molecules         |
| 227 | POS_689   | Guanine                              | Organoheterocyclic compounds            |
| 228 | POS_3680  | Guanosine                            | Nucleosides, nucleotides, and analogues |
| 229 | POS_6960  | Hexa(methoxymethyl)melamine          | Organic nitrogen compounds              |
| 230 | POS_12168 | HexCer 34:2;3O HexCer 18:2;2O/16:0;O | Undefined                               |
| 231 | POS_11914 | HexCer 34:3;2O HexCer 18:2;2O/16:1   | Undefined                               |
| 232 | POS_1363  | Hexylresorcinol                      | Benzenoids                              |
| 233 | POS_5391  | Himbacine                            | Organoheterocyclic compounds            |
| 234 | POS_5907  | Hirsuteine                           | Alkaloids and derivatives               |
| 235 | POS_5950  | Hirsutine                            |                                         |
| 236 | POS_748   | Histidine                            | Organic acids and derivatives           |
| 237 | POS_325   | Hydron;benzoate                      | Benzenoids                              |
| 238 | POS_338   | Hydron;pyridine-3-carboxylate        | Organoheterocyclic compounds            |
| 239 | POS_225   | Hydroquinone                         | Benzenoids                              |
| 240 | POS_8681  | Hyperoside                           | Phenylpropanoids and polyketides        |
| 241 | POS_7238  | Icariside F2                         | Organic oxygen compounds                |
| 242 | POS_14    | Imidazole                            | Organoheterocyclic compounds            |
| 243 | POS_5455  | Imidocarb                            | Benzenoids                              |
| 244 | POS_7395  | Imperialine                          | Lipids and lipid-like molecules         |
| 245 | POS_3002  | Indigo                               | Undefined                               |
| 246 | POS_599   | Indole-3-carboxaldehyde              | Organoheterocyclic compounds            |
| 247 | POS_3126  | Inosine                              | Nucleosides, nucleotides, and analogues |
| 248 | POS_107   | Isobutyric acid                      | Organic acids and derivatives           |
| 249 | POS_13449 | Isobutyryl CoA                       | Lipids and lipid-like molecules         |
| 250 | POS_9865  | Isogomphrenin I                      | Organic oxygen compounds                |
| 251 | POS_2597  | Isoleucylaspartic acid               | Organic acids and derivatives           |
| 252 | POS_1777  | Isoleucylserine                      | Organic acids and derivatives           |

|     |           |                                 |                                           |
|-----|-----------|---------------------------------|-------------------------------------------|
| 253 | POS_512   | Isophorone                      | Organic oxygen compounds                  |
| 254 | POS_8222  | Isoquercitin                    | Phenylpropanoids and polyketides          |
| 255 | POS_5926  | Jacobine N-oxide                | Alkaloids and derivatives                 |
| 256 | POS_6248  | Junipediol B 8-O-glucoside      | Organic oxygen compounds                  |
| 257 | POS_7475  | Kaempferol 7-O-rhamnoside       | Phenylpropanoids and polyketides          |
| 258 | POS_6200  | Karakoline                      | Lipids and lipid-like molecules           |
| 259 | POS_12265 | Khasianine                      | Undefined                                 |
| 260 | POS_109   | Lactamide                       | Organic oxygen compounds                  |
| 261 | POS_5328  | Lauramidopropylbetaine          | Organic acids and derivatives             |
| 262 | POS_3818  | Lauryl diethanolamide           | Lipids and lipid-like molecules           |
| 263 | POS_9946  | [Leu]enkephalin                 | Organic acids and derivatives             |
| 264 | POS_10870 | L-Glutathione (oxidized form)   | Organic acids and derivatives             |
| 265 | POS_309   | L-Homoserine                    | Organic acids and derivatives             |
| 266 | POS_5398  | Limocitrin                      | Phenylpropanoids and polyketides          |
| 267 | POS_501   | Limonene                        | Lipids and lipid-like molecules           |
| 268 | POS_442   | L-Norleucine                    | Organic acids and derivatives             |
| 269 | POS_6300  | Loratadine                      | Organoheterocyclic compounds              |
| 270 | POS_7300  | Lovastatin                      | Organoheterocyclic compounds              |
| 271 | POS_8833  | LPC 16:1                        | Undefined                                 |
| 272 | POS_7272  | Lupenone                        | Undefined                                 |
| 273 | POS_979   | Lupinine                        | Alkaloids and derivatives                 |
| 274 | POS_3770  | Luteolin                        | Phenylpropanoids and polyketides          |
| 275 | POS_10283 | Lyoniside                       | Lignans, neolignans and related compounds |
| 276 | POS_6008  | MEF-Glu                         | Organic acids and derivatives             |
| 277 | POS_377   | Melamine                        | Organoheterocyclic compounds              |
| 278 | POS_1126  | Methyl 4-hydroxycinnamate       | Undefined                                 |
| 279 | POS_4010  | Methyl linoleate                | Undefined                                 |
| 280 | POS_299   | Methylmalonic acid              | Organic acids and derivatives             |
| 281 | POS_3073  | Mirtazapine                     | Organoheterocyclic compounds              |
| 282 | POS_12386 | MMPE 34:2 MMPE 16:0_18:2        | Undefined                                 |
| 283 | POS_4591  | Mucorisocoumarin B              | Phenylpropanoids and polyketides          |
| 284 | POS_8490  | Mundulone acetate               | Phenylpropanoids and polyketides          |
| 285 | POS_6027  | Myristamidopropyl betaine       | Organic acids and derivatives             |
| 286 | POS_5645  | N-(2-Hydroxyethyl)icosanamide   | Organic nitrogen compounds                |
| 287 | POS_5751  | N-(2-Phenylethyl)hexadecanamide | Lipids and lipid-like molecules           |
| 288 | POS_5543  | N(4)-Acetylsulfadimethoxine     | Benzenoids                                |
| 289 | POS_3567  | N6-Methyladenosine              | Nucleosides, nucleotides, and analogues   |
| 290 | POS_1272  | N6,N6,N6-Trimethyl-L-lysine     | Organic acids and derivatives             |
| 291 | POS_12594 | Naadp                           | Nucleosides, nucleotides, and analogues   |
| 292 | POS_3302  | Nandrolone                      | Lipids and lipid-like molecules           |
| 293 | POS_392   | Naphthalene                     | Benzenoids                                |
| 294 | POS_10713 | Naringin                        | Undefined                                 |
| 295 | POS_3070  | N-Benzylloxycarbonyl-L-leucine  | Organic acids and derivatives             |

|     |           |                                  |                                         |
|-----|-----------|----------------------------------|-----------------------------------------|
| 296 | POS_394   | N-Cyclohexylformamide            | Organic acids and derivatives           |
| 297 | POS_1583  | Neocuproine                      | Organoheterocyclic compounds            |
| 298 | POS_6212  | Neotame                          | Organic acids and derivatives           |
| 299 | POS_1458  | N-Methyldodecylamine             | Organic nitrogen compounds              |
| 300 | POS_1493  | N,N-Dimethylarginine             | Organic acids and derivatives           |
| 301 | POS_1235  | N,N-Dimethyldecylamine           | Organic nitrogen compounds              |
| 302 | POS_1692  | N,N-Dimethyldodecylamine         | Organic nitrogen compounds              |
| 303 | POS_2083  | N,N-Dimethyldodecylamine N-oxide | Organic nitrogen compounds              |
| 304 | POS_4447  | N,N-Dimethylguanosine            | Nucleosides, nucleotides, and analogues |
| 305 | POS_7563  | Nonaethylene glycol              | Organic oxygen compounds                |
| 306 | POS_7001  | Norbuprenorphine                 | Benzenoids                              |
| 307 | POS_3925  | Norcimifugin                     | Undefined                               |
| 308 | POS_4477  | Norclozapine                     | Organoheterocyclic compounds            |
| 309 | POS_5074  | Nor-Dentatin                     | Phenylpropanoids and polyketides        |
| 310 | POS_2162  | Norfentanyl                      | Benzenoids                              |
| 311 | POS_975   | Npi-methyl-L-histidine           | Organic acids and derivatives           |
| 312 | POS_1502  | O-Acetylcarnitine                | Lipids and lipid-like molecules         |
| 313 | POS_3710  | Octadecanamide                   | Organic acids and derivatives           |
| 314 | POS_6517  | Octaethylene glycol              | Organic oxygen compounds                |
| 315 | POS_3890  | Octyl methoxycinnamate           | Phenylpropanoids and polyketides        |
| 316 | POS_7346  | O-Stearoylcarnitine              | Lipids and lipid-like molecules         |
| 317 | POS_7818  | Oxaline                          | Organoheterocyclic compounds            |
| 318 | POS_455   | Oxindole                         | Organoheterocyclic compounds            |
| 319 | POS_8603  | Paeonolide                       | Undefined                               |
| 320 | POS_2857  | Palmitic amide                   | Undefined                               |
| 321 | POS_1790  | Pantothenic acid                 | Organic acids and derivatives           |
| 322 | POS_12421 | PC 32:1 PC 16:0_16:1             | Undefined                               |
| 323 | POS_12334 | PC 32:4 PC 14:1_18:3             | Undefined                               |
| 324 | POS_12602 | PC 33:1 PC 15:0_18:1             | Undefined                               |
| 325 | POS_12586 | PC 33:2 PC 15:0_18:2             | Undefined                               |
| 326 | POS_12561 | PC 33:3 PC 15:0_18:3             | Undefined                               |
| 327 | POS_12776 | PC 34:1 PC 16:0_18:1             | Undefined                               |
| 328 | POS_12720 | PC 34:3 PC 16:0_18:3             | Undefined                               |
| 329 | POS_12692 | PC 34:4 PC 16:1_18:3             | Undefined                               |
| 330 | POS_13036 | PC 36:2 PC 18:1_18:1             | Undefined                               |
| 331 | POS_13016 | PC 36:3 PC 18:1_18:2             | Undefined                               |
| 332 | POS_13001 | PC 36:4 PC 18:2_18:2             | Undefined                               |
| 333 | POS_13211 | PC 38:6 PC 18:3_20:3             | Undefined                               |
| 334 | POS_12197 | PE 34:2 PE 16:0_18:2             | Undefined                               |
| 335 | POS_1052  | Peganine                         | Organoheterocyclic compounds            |
| 336 | POS_7981  | Peimine                          | Lipids and lipid-like molecules         |
| 337 | POS_7396  | Peiminine                        | Undefined                               |
| 338 | POS_7339  | Peimisine                        | Undefined                               |

|     |           |                             |                                  |
|-----|-----------|-----------------------------|----------------------------------|
| 339 | POS_10591 | Pelargonin                  | Phenylpropanoids and polyketides |
| 340 | POS_5954  | Perindopril                 | Organic acids and derivatives    |
| 341 | POS_1888  | Phenazine-1-carboxylic acid | Organoheterocyclic compounds     |
| 342 | POS_918   | Phenylalanine               | Organic acids and derivatives    |
| 343 | POS_1075  | Phenyl dihydrogen phosphate | Organic acids and derivatives    |
| 344 | POS_369   | Phloroglucinol              | Benzenoids                       |
| 345 | POS_1192  | Phosphocholine              | Organic nitrogen compounds       |
| 346 | POS_1191  | Phosphorylcholine           | Organic nitrogen compounds       |
| 347 | POS_923   | Phthalic acid               | Benzenoids                       |
| 348 | POS_626   | Phthalic anhydride          | Undefined                        |
| 349 | POS_4635  | Phytosphingosine            | Organic nitrogen compounds       |
| 350 | POS_421   | Pipecolic acid              | Organic acids and derivatives    |
| 351 | POS_87    | Piperidine                  | Organoheterocyclic compounds     |
| 352 | POS_7937  | Polygalatenoside A          | Organic oxygen compounds         |
| 353 | POS_10372 | Procyanidin B2              | Phenylpropanoids and polyketides |
| 354 | POS_279   | Proline                     | Organic acids and derivatives    |
| 355 | POS_1275  | Propamocarb                 | Benzenoids                       |
| 356 | POS_2947  | Propranolol                 | Benzenoids                       |
| 357 | POS_1776  | Pterosin B                  | Benzenoids                       |
| 358 | POS_2207  | Pterosin G                  | Benzenoids                       |
| 359 | POS_1626  | Pyocyanine                  | Organoheterocyclic compounds     |
| 360 | POS_4807  | Quinidine                   | Alkaloids and derivatives        |
| 361 | POS_419   | Quinoline                   | Organoheterocyclic compounds     |
| 362 | POS_6720  | Reserpine acid              | Alkaloids and derivatives        |
| 363 | POS_6168  | Riboflavin                  | Organoheterocyclic compounds     |
| 364 | POS_2968  | Ropinirole                  | Organoheterocyclic compounds     |
| 365 | POS_4095  | Roquefortine A              | Alkaloids and derivatives        |
| 366 | POS_7595  | Sayaendoside                | Organic oxygen compounds         |
| 367 | POS_10380 | Sciadopitysin               | Phenylpropanoids and polyketides |
| 368 | POS_1928  | Secbumeton                  | Organoheterocyclic compounds     |
| 369 | POS_13627 | Solamargine                 | Lipids and lipid-like molecules  |
| 370 | POS_7011  | Solasodine                  | Undefined                        |
| 371 | POS_13731 | Solasonine                  | Lipids and lipid-like molecules  |
| 372 | POS_7122  | Solvent green 3             | Benzenoids                       |
| 373 | POS_5670  | Songorine                   | Lipids and lipid-like molecules  |
| 374 | POS_2635  | Sophoridine                 | Undefined                        |
| 375 | POS_14112 | Soyasaponin Ba              | Lipids and lipid-like molecules  |
| 376 | POS_2236  | Sparteine sulfate           | Undefined                        |
| 377 | POS_4129  | Sphingosine                 | Organic nitrogen compounds       |
| 378 | POS_4077  | Spiroxamine                 | Organic oxygen compounds         |
| 379 | POS_926   | (S)-Suspensaside            | Organic oxygen compounds         |
| 380 | POS_6934  | STIGMASTA-4,22-DIEN-3-ONE   | Undefined                        |
| 381 | POS_6984  | Stigmasterol                | Lipids and lipid-like molecules  |

|     |           |                                                                                                |                                           |
|-----|-----------|------------------------------------------------------------------------------------------------|-------------------------------------------|
| 382 | POS_5078  | Strychnine                                                                                     | Alkaloids and derivatives                 |
| 383 | POS_2553  | Suberosin                                                                                      | Phenylpropanoids and polyketides          |
| 384 | POS_4398  | Sulfadimethoxine                                                                               | Benzenoids                                |
| 385 | POS_7738  | Tetracycline                                                                                   | Phenylpropanoids and polyketides          |
| 386 | POS_6051  | Tetradecanoylcarnitine                                                                         | Lipids and lipid-like molecules           |
| 387 | POS_5833  | Tetraethylene glycol monododecyl ether                                                         | Organic oxygen compounds                  |
| 388 | POS_10999 | Thalsimidine                                                                                   | Lignans, neolignans and related compounds |
| 389 | POS_1156  | Theobromine                                                                                    | Organoheterocyclic compounds              |
| 390 | POS_2149  | Threonylleucine                                                                                | Organic acids and derivatives             |
| 391 | POS_4917  | Tiapride                                                                                       | Benzenoids                                |
| 392 | POS_3029  | Tramadol                                                                                       | Benzenoids                                |
| 393 | POS_7687  | Trichoverrol A                                                                                 | Lipids and lipid-like molecules           |
| 394 | POS_8803  | Tricin 5-glucoside                                                                             | Phenylpropanoids and polyketides          |
| 395 | POS_671   | Triethanolamine                                                                                | Organic nitrogen compounds                |
| 396 | POS_6866  | Trifloxystrobin                                                                                | Benzenoids                                |
| 397 | POS_503   | Trigonelline HCl                                                                               | Undefined                                 |
| 398 | POS_3093  | Triisobutyl phosphate                                                                          | Organic acids and derivatives             |
| 399 | POS_0     | Trimethylamine                                                                                 | Organic nitrogen compounds                |
| 400 | POS_4858  | Triphenyl phosphate                                                                            | Organic acids and derivatives             |
| 401 | POS_3394  | Triphenylphosphine oxide                                                                       | Benzenoids                                |
| 402 | POS_5699  | Triptonide                                                                                     | Undefined                                 |
| 403 | POS_4856  | Tris(1-chloro-2-propyl)phosphate                                                               | Organic acids and derivatives             |
| 404 | POS_4636  | Tsitsikammamine B                                                                              | Organoheterocyclic compounds              |
| 405 | POS_6146  | Tuberostemonine                                                                                | Undefined                                 |
| 406 | POS_317   | Tyramine                                                                                       | Benzenoids                                |
| 407 | POS_1172  | Tyrosine                                                                                       | Organic acids and derivatives             |
| 408 | POS_12916 | Unguisin E                                                                                     | Organic acids and derivatives             |
| 409 | POS_249   | Uracil                                                                                         | Organoheterocyclic compounds              |
| 410 | POS_2551  | Uridine                                                                                        | Nucleosides, nucleotides, and analogues   |
| 411 | POS_5489  | Vinpocetine                                                                                    | Alkaloids and derivatives                 |
| 412 | POS_6167  | Xanthohumol                                                                                    | Phenylpropanoids and polyketides          |
| 413 | POS_9499  | Xolegel                                                                                        | Organoheterocyclic compounds              |
| 414 | POS_5254  | Yohimbic Acid                                                                                  | Alkaloids and derivatives                 |
| 415 | NEG_1394  | 14-(3-Ethylloxiran-2-yl)tetradeca-9,12-dienoic acid                                            | Lipids and lipid-like molecules           |
| 416 | NEG_1841  | (15Z)-9,12,13-Trihydroxy-15-octadecenoic acid                                                  | Lipids and lipid-like molecules           |
| 417 | NEG_6920  | 16-Hydroxy-3-(beta-D-xylopyranosyloxy)-, (3beta,5xi,9xi,16alpha)-olean-12-ene-23,28-dioic acid | Lipids and lipid-like molecules           |
| 418 | NEG_5504  | 1-Palmitoylphosphatidylcholine                                                                 | Lipids and lipid-like molecules           |
| 419 | NEG_5820  | 2-[4-[4-[Hydroxy-(4-hydroxy-3-methoxyphenyl)methyl]-3-(hydroxymethyl)oxolan-2-yl]-2-           | Lignans, neolignans and related compounds |

|     |          |                                                                                                                                          |                                  |
|-----|----------|------------------------------------------------------------------------------------------------------------------------------------------|----------------------------------|
|     |          | methoxyphenoxy]-6-(hydroxymethyl)oxane-3,4,5-triol                                                                                       |                                  |
| 420 | NEG_4441 | 2-Azaniumylethyl (2-hydroxy-3-octadec-9-enoyloxypropyl) phosphate                                                                        | Lipids and lipid-like molecules  |
| 421 | NEG_3887 | 2-Azaniumylethyl (3-hexadecanoyloxy-2-hydroxypropyl) phosphate                                                                           | Lipids and lipid-like molecules  |
| 422 | NEG_1573 | 2-Dodecoxyethyl hydrogen sulfate                                                                                                         | Organic acids and derivatives    |
| 423 | NEG_7992 | [2-Hydroxy-3-[3,4,5-trihydroxy-6-[[3,4,5-trihydroxy-6-(hydroxymethyl)oxan-2-yl]oxymethyl]oxan-2-yl]oxypropyl] octadeca-9,12,15-trienoate | Lipids and lipid-like molecules  |
| 424 | NEG_5835 | [2-Hydroxy-3-[3,4,5-trihydroxy-6-(hydroxymethyl)oxan-2-yl]oxypropyl] octadeca-9,12-dienoate                                              | Lipids and lipid-like molecules  |
| 425 | NEG_5922 | (2-Hydroxy-3-octadec-9-enoyloxypropyl) 2-(trimethylazaniumyl)ethyl phosphate                                                             | Lipids and lipid-like molecules  |
| 426 | NEG_5855 | (2-Hydroxy-3-octadeca-9,12,15-trienoyloxypropyl) 2-(trimethylazaniumyl)ethyl phosphate                                                   | Lipids and lipid-like molecules  |
| 427 | NEG_5889 | (2-Hydroxy-3-octadeca-9,12-dienoyloxypropyl) 2-(trimethylazaniumyl)ethyl phosphate                                                       | Lipids and lipid-like molecules  |
| 428 | NEG_2482 | 2-Hydroxy-4-methoxy-3,5-bis(3-methylbut-2-enyl)-6-pentylbenzoic acid                                                                     | Benzenoids                       |
| 429 | NEG_5883 | 2-Oahsa                                                                                                                                  | Lipids and lipid-like molecules  |
| 430 | NEG_4389 | [3-[2-Aminoethoxy(hydroxy)phosphoryl]oxy-2-hydroxypropyl] octadeca-9,12-dienoate                                                         | Lipids and lipid-like molecules  |
| 431 | NEG_2096 | 3(2'-Chlorophenyl)-7-hydroxy-4-phenylcoumarin                                                                                            | Phenylpropanoids and polyketides |
| 432 | NEG_671  | 3-(4-Hydroxy-3-methoxyphenyl)-2-propenoic acid                                                                                           | Phenylpropanoids and polyketides |
| 433 | NEG_5793 | 3-(Hexopyranosyloxy)-2-hydroxypropyl ester, (9Z,12Z,15Z)-9,12,15-octadecatrienoic acid                                                   | Lipids and lipid-like molecules  |
| 434 | NEG_240  | 3-Hydroxybenzoic acid                                                                                                                    | Benzenoids                       |
| 435 | NEG_1726 | (3S)-5-[(1R,2R,8aS)-2-hydroxy-2,5,5,8a-tetramethyl-3,4,4a,6,7,8-hexahydro-1H-naphthalen-1-yl]-3-methylpentanoic acid                     | Lipids and lipid-like molecules  |
| 436 | NEG_156  | 4-Hydroxybenzaldehyde                                                                                                                    | Organic oxygen compounds         |
| 437 | NEG_1453 | 4-Hydroxybenzoic acid 4-O-glucoside                                                                                                      | Organic oxygen compounds         |
| 438 | NEG_437  | 4-Hydroxycinnamic acid                                                                                                                   | Phenylpropanoids and polyketides |
| 439 | NEG_273  | 4-Hydroxyquinoline                                                                                                                       | Organoheterocyclic compounds     |
| 440 | NEG_248  | 4-Nitrophenol                                                                                                                            | Benzenoids                       |
| 441 | NEG_2128 | 5-(5-Methoxycarbonyl-5,8a-dimethyl-2-methylidene-3,4,4a,6,7,8-hexahydro-1H-naphthalen-1-yl)-3-methylpentanoic acid                       | Lipids and lipid-like molecules  |

|     |          |                                                                                                                                         |                                  |
|-----|----------|-----------------------------------------------------------------------------------------------------------------------------------------|----------------------------------|
| 442 | NEG_4952 | 5,7-Dihydroxy-2-(4-hydroxy-3,5-dimethoxyphenyl)-3-[(2S,3R,4S,5R,6R)-3,4,5-trihydroxy-6-(hydroxymethyl)oxan-2-yl]oxychromen-4-one        | Phenylpropanoids and polyketides |
| 443 | NEG_4732 | (6,6-Dimethylbicyclo[3.1.1]hept-2-yl)methyl 6-O-[(2R,3R,4R)-3,4-dihydroxy-4-(hydroxymethyl)tetrahydro-2-furanyl]-beta-D-glucopyranoside | Lipids and lipid-like molecules  |
| 444 | NEG_2755 | 7-Ethyl-10-Hydroxy-Camptothecin                                                                                                         | Undefined                        |
| 445 | NEG_1362 | 8-(2-Oxo-5-pent-2-enylcyclopent-3-en-1-yl)octanoic acid                                                                                 | Lipids and lipid-like molecules  |
| 446 | NEG_1838 | 9,12,13-Trihydroxyoctadec-10-enoic acid                                                                                                 | Lipids and lipid-like molecules  |
| 447 | NEG_1800 | 9,12,13-Trihydroxyoctadeca-10,15-dienoic acid                                                                                           | Lipids and lipid-like molecules  |
| 448 | NEG_1074 | 9-Hexadecenoic acid                                                                                                                     | Lipids and lipid-like molecules  |
| 449 | NEG_1600 | 9-Hydroperoxyoctadeca-10,12-dienoic acid                                                                                                | Lipids and lipid-like molecules  |
| 450 | NEG_1408 | 9-Hydroxy-10E,12Z-octadecadienoic acid                                                                                                  | Lipids and lipid-like molecules  |
| 451 | NEG_2524 | 9-Methoxycamptothecin                                                                                                                   | Alkaloids and derivatives        |
| 452 | NEG_1502 | Abietic acid                                                                                                                            | Lipids and lipid-like molecules  |
| 453 | NEG_216  | Adenine                                                                                                                                 | Organoheterocyclic compounds     |
| 454 | NEG_3446 | Afzelin                                                                                                                                 | Phenylpropanoids and polyketides |
| 455 | NEG_8365 | alpha-Hederin                                                                                                                           | Undefined                        |
| 456 | NEG_9545 | alpha-Solanine                                                                                                                          | Undefined                        |
| 457 | NEG_7928 | Amatain                                                                                                                                 | Alkaloids and derivatives        |
| 458 | NEG_1789 | Androsin                                                                                                                                | Organic oxygen compounds         |
| 459 | NEG_8232 | Apigenin 7-O-(2G-rhamnosyl)gentiobioside                                                                                                | Undefined                        |
| 460 | NEG_1522 | Arachidonic acid                                                                                                                        | Lipids and lipid-like molecules  |
| 461 | NEG_4606 | Asiatic acid                                                                                                                            | Undefined                        |
| 462 | NEG_4670 | Aurantio-obtusin beta-D-glucoside                                                                                                       | Benzenoids                       |
| 463 | NEG_4605 | Bayogenin                                                                                                                               | Undefined                        |
| 464 | NEG_3968 | Betulinic acid                                                                                                                          | Lipids and lipid-like molecules  |
| 465 | NEG_674  | Butylparaben                                                                                                                            | Benzenoids                       |
| 466 | NEG_1996 | Caffeic acid hexoside                                                                                                                   | Phenylpropanoids and polyketides |
| 467 | NEG_829  | Calcium pantothenate                                                                                                                    | Undefined                        |
| 468 | NEG_1963 | Canrenone                                                                                                                               | Lipids and lipid-like molecules  |
| 469 | NEG_498  | cis-Aconitic acid                                                                                                                       | Organic acids and derivatives    |
| 470 | NEG_547  | cis-Caffeic acid                                                                                                                        | Phenylpropanoids and polyketides |
| 471 | NEG_2939 | Corynanthine                                                                                                                            | Alkaloids and derivatives        |
| 472 | NEG_1307 | Cyanidin                                                                                                                                | Phenylpropanoids and polyketides |
| 473 | NEG_8422 | Cyanidin 3-(2G-glucosylrutinoside)                                                                                                      | Undefined                        |
| 474 | NEG_3760 | Cyanidin 3-O-glucoside                                                                                                                  | Phenylpropanoids and polyketides |
| 475 | NEG_6983 | Decahydrogambogic acid                                                                                                                  | Organoheterocyclic compounds     |
| 476 | NEG_1460 | Dehydroabietic acid                                                                                                                     | Lipids and lipid-like molecules  |
| 477 | NEG_4287 | Deoxynivalenol 3-glucuronide                                                                                                            | Lipids and lipid-like molecules  |

|     |          |                                                                                                            |                                  |
|-----|----------|------------------------------------------------------------------------------------------------------------|----------------------------------|
| 478 | NEG_2982 | Desoxyrhaponticin                                                                                          | Undefined                        |
| 479 | NEG_552  | D-Glucose                                                                                                  | Organic oxygen compounds         |
| 480 | NEG_2753 | Digoxigenin                                                                                                | Lipids and lipid-like molecules  |
| 481 | NEG_2257 | Dinoprost                                                                                                  | Lipids and lipid-like molecules  |
| 482 | NEG_1805 | Docosahexaenoic acid                                                                                       | Lipids and lipid-like molecules  |
| 483 | NEG_1980 | Docosanoic acid                                                                                            | Lipids and lipid-like molecules  |
| 484 | NEG_1744 | Dodecylbenzenesulfonic acid                                                                                | Benzenoids                       |
| 485 | NEG_5733 | Dronedarone                                                                                                | Organic oxygen compounds         |
| 486 | NEG_2386 | (E)-3-(3,4-Dihydroxyphenyl)acrylic acid<br>(1R,2R,3R)-2,3,5-trihydroxy-5-(methoxycarbonyl)cyclohexyl ester | Organic oxygen compounds         |
| 487 | NEG_6923 | Echinocystic acid-3-O-glucoside                                                                            | Undefined                        |
| 488 | NEG_3633 | (-)-Epicatechin gallate                                                                                    | Phenylpropanoids and polyketides |
| 489 | NEG_3984 | (-)-Epigallocatechin gallate                                                                               | Phenylpropanoids and polyketides |
| 490 | NEG_8171 | Erythromycin                                                                                               | Organic oxygen compounds         |
| 491 | NEG_3124 | FA 26:0;2O                                                                                                 | Lipids and lipid-like molecules  |
| 492 | NEG_3093 | FA 27:0                                                                                                    | Lipids and lipid-like molecules  |
| 493 | NEG_3624 | Folic acid                                                                                                 | Organic acids and derivatives    |
| 494 | NEG_138  | Fumaric acid                                                                                               | Organic acids and derivatives    |
| 495 | NEG_461  | Gallic acid                                                                                                | Benzenoids                       |
| 496 | NEG_479  | gamma-Aminobutyrate                                                                                        | Organic acids and derivatives    |
| 497 | NEG_1255 | gamma-Linolenic acid                                                                                       | Lipids and lipid-like molecules  |
| 498 | NEG_1383 | Gingerol                                                                                                   | Benzenoids                       |
| 499 | NEG_6987 | Ginsenoside F1                                                                                             | Undefined                        |
| 500 | NEG_9161 | Ginsenoside F2                                                                                             | Undefined                        |
| 501 | NEG_8585 | Ginsenoside F3                                                                                             | Undefined                        |
| 502 | NEG_9937 | Ginsenoside Rb1                                                                                            | Undefined                        |
| 503 | NEG_8904 | Ginsenoside Rf                                                                                             | Undefined                        |
| 504 | NEG_8724 | Ginsenoside Rg2                                                                                            | Undefined                        |
| 505 | NEG_8723 | Ginsenoside Rg3(R-FORM)                                                                                    | Undefined                        |
| 506 | NEG_8532 | Ginsenoside Rg5                                                                                            | Undefined                        |
| 507 | NEG_7551 | Ginsenoside Rh1                                                                                            | Undefined                        |
| 508 | NEG_7353 | Ginsenoside Rh2 (S-FORM)                                                                                   | Undefined                        |
| 509 | NEG_1141 | Glucose 6-phosphate                                                                                        | Organic oxygen compounds         |
| 510 | NEG_670  | Glucuronic acid                                                                                            | Undefined                        |
| 511 | NEG_4166 | Glycocholic acid                                                                                           | Lipids and lipid-like molecules  |
| 512 | NEG_7236 | Gypsogenin-3-O-glucuronide                                                                                 | Undefined                        |
| 513 | NEG_1756 | Heneicosanoic acid                                                                                         | Lipids and lipid-like molecules  |
| 514 | NEG_1200 | Heptadecanoic acid                                                                                         | Lipids and lipid-like molecules  |
| 515 | NEG_1452 | Hispidulin                                                                                                 | Phenylpropanoids and polyketides |
| 516 | NEG_661  | Hydron;2-hydroxypropane-1,2,3-tricarboxylate                                                               | Organic acids and derivatives    |
| 517 | NEG_1389 | Hydron;tetradecyl sulfate                                                                                  | Organic acids and derivatives    |
| 518 | NEG_2342 | Indapamide                                                                                                 | Benzenoids                       |



|     |          |                                                                                                                                                           |                                  |
|-----|----------|-----------------------------------------------------------------------------------------------------------------------------------------------------------|----------------------------------|
| 519 | NEG_4126 | Isoquercitrin                                                                                                                                             | Phenylpropanoids and polyketides |
| 520 | NEG_1642 | Isorhamnetin                                                                                                                                              | Phenylpropanoids and polyketides |
| 521 | NEG_6804 | Isorhamnetin-3-O-galactoside-6"-rhamnoside                                                                                                                | Undefined                        |
| 522 | NEG_4400 | Isorhamnetin-3-O-glucoside                                                                                                                                | Phenylpropanoids and polyketides |
| 523 | NEG_3236 | Isorhapontin                                                                                                                                              | Phenylpropanoids and polyketides |
| 524 | NEG_1877 | Isoxaben                                                                                                                                                  | Benzenoids                       |
| 525 | NEG_6075 | Kaempferitrin                                                                                                                                             | Undefined                        |
| 526 | NEG_1306 | Kaempferol                                                                                                                                                | Phenylpropanoids and polyketides |
| 527 | NEG_6614 | Kaempferol 3,7-diglucoside                                                                                                                                | Phenylpropanoids and polyketides |
| 528 | NEG_6357 | Kaempferol-3-O-glucoside-6"-p-coumaroyl                                                                                                                   | Undefined                        |
| 529 | NEG_6360 | Kaempferol-3-O-glucoside-7-O-rhamnoside                                                                                                                   | Phenylpropanoids and polyketides |
| 530 | NEG_6609 | Kaempferol 3-O-sophoroside                                                                                                                                | Undefined                        |
| 531 | NEG_5323 | Kukoamine A                                                                                                                                               | Undefined                        |
| 532 | NEG_1164 | Lauryl sulfate                                                                                                                                            | Organic acids and derivatives    |
| 533 | NEG_4771 | Leukotriene D4                                                                                                                                            | Lipids and lipid-like molecules  |
| 534 | NEG_1267 | Linoleic acid                                                                                                                                             | Lipids and lipid-like molecules  |
| 535 | NEG_1257 | Linolenic acid                                                                                                                                            | Lipids and lipid-like molecules  |
| 536 | NEG_211  | L-Malic acid                                                                                                                                              | Organic acids and derivatives    |
| 537 | NEG_1310 | Loureirin A                                                                                                                                               | Undefined                        |
| 538 | NEG_4363 | LPE 18:3                                                                                                                                                  | Undefined                        |
| 539 | NEG_4555 | LPG 16:0                                                                                                                                                  | Undefined                        |
| 540 | NEG_4513 | LPG 16:1                                                                                                                                                  | Undefined                        |
| 541 | NEG_4963 | LPG 18:2                                                                                                                                                  | Undefined                        |
| 542 | NEG_4917 | LPG 18:3                                                                                                                                                  | Undefined                        |
| 543 | NEG_5988 | LPI 16:0                                                                                                                                                  | Undefined                        |
| 544 | NEG_6399 | LPI 18:2                                                                                                                                                  | Undefined                        |
| 545 | NEG_5167 | LPS 18:2                                                                                                                                                  | Undefined                        |
| 546 | NEG_5134 | LPS 18:3                                                                                                                                                  | Undefined                        |
| 547 | NEG_175  | L-Pyroglutamic acid                                                                                                                                       | Organic acids and derivatives    |
| 548 | NEG_3762 | Luteolin-7-O-glucoside                                                                                                                                    | Undefined                        |
| 549 | NEG_6359 | Luteolin 7-O-rutinoside                                                                                                                                   | Phenylpropanoids and polyketides |
| 550 | NEG_4883 | Madecassic acid                                                                                                                                           | Undefined                        |
| 551 | NEG_4851 | Medicagenic acid                                                                                                                                          | Lipids and lipid-like molecules  |
| 552 | NEG_1641 | Methoxyluteolin                                                                                                                                           | Phenylpropanoids and polyketides |
| 553 | NEG_5067 | Methyl (3R,4R,5R)-5-[(2R,3R,4S,5S,6R)-4,5-dihydroxy-6-(hydroxymethyl)-3-[(E)-3-phenylprop-2-enoyl]oxyoxan-2-yl]oxy-3,4-dihydroxycyclohexene-1-carboxylate | Lipids and lipid-like molecules  |
| 554 | NEG_1651 | Methyl hexadecanoate                                                                                                                                      | Undefined                        |
| 555 | NEG_8506 | Momordin Ic                                                                                                                                               | Undefined                        |
| 556 | NEG_2708 | Mycophenolic acid IV                                                                                                                                      | Lipids and lipid-like molecules  |
| 557 | NEG_4450 | Myricetin-3-Galactoside                                                                                                                                   | Phenylpropanoids and polyketides |
| 558 | NEG_4124 | Myricitrin                                                                                                                                                | Phenylpropanoids and polyketides |

|     |          |                               |                                  |
|-----|----------|-------------------------------|----------------------------------|
| 559 | NEG_1358 | N(4)-Acetylsulfadiazine       | Benzenoids                       |
| 560 | NEG_2372 | Nervonic acid                 | Lipids and lipid-like molecules  |
| 561 | NEG_3698 | Nonyl glucosinolate           | Organic oxygen compounds         |
| 562 | NEG_6633 | Novobiocin                    | Phenylpropanoids and polyketides |
| 563 | NEG_5867 | NP-000062(6)                  | Undefined                        |
| 564 | NEG_3330 | Octacosanoic acid             | Lipids and lipid-like molecules  |
| 565 | NEG_1281 | Oleic acid                    | Lipids and lipid-like molecules  |
| 566 | NEG_7402 | PA 34:2 PA 16:0_18:2          | Undefined                        |
| 567 | NEG_7377 | PA 34:3 PA 16:0_18:3          | Undefined                        |
| 568 | NEG_7695 | PA 36:4 PA 18:2_18:2          | Undefined                        |
| 569 | NEG_7671 | PA 36:5 PA 18:2_18:3          | Undefined                        |
| 570 | NEG_1090 | Palmitic acid                 | Lipids and lipid-like molecules  |
| 571 | NEG_9165 | PC 36:2 PC 18:0_18:2          | Undefined                        |
| 572 | NEG_9119 | PC 36:5 PC 18:2_18:3          | Undefined                        |
| 573 | NEG_7947 | PE 34:1                       | Undefined                        |
| 574 | NEG_7916 | PE 34:2                       | Undefined                        |
| 575 | NEG_8261 | PE 36:3                       | Undefined                        |
| 576 | NEG_8225 | PE 36:4 PE 18:2_18:2          | Undefined                        |
| 577 | NEG_8200 | PE 36:5 PE 18:2_18:3          | Undefined                        |
| 578 | NEG_2604 | Pentacosanoic acid            | Lipids and lipid-like molecules  |
| 579 | NEG_960  | Pentadecanoic acid            | Lipids and lipid-like molecules  |
| 580 | NEG_4401 | Petunidin 3-galactoside       | Phenylpropanoids and polyketides |
| 581 | NEG_7674 | PG 30:0                       | Undefined                        |
| 582 | NEG_8329 | PG 34:2 PG 16:0_18:2          | Undefined                        |
| 583 | NEG_8628 | PG 36:2                       | Undefined                        |
| 584 | NEG_8587 | PG 36:4                       | Undefined                        |
| 585 | NEG_8567 | PG 36:5 PG 18:2_18:3          | Undefined                        |
| 586 | NEG_4899 | Phosphatidylcholine lyso 18:2 | Lipids and lipid-like molecules  |
| 587 | NEG_4861 | Phosphatidylcholine lyso 18:3 | Lipids and lipid-like molecules  |
| 588 | NEG_5362 | Phytolaccagenin               | Undefined                        |
| 589 | NEG_9200 | PI 34:1                       | Undefined                        |
| 590 | NEG_9187 | PI 34:2                       | Undefined                        |
| 591 | NEG_9269 | PI 35:2                       | Undefined                        |
| 592 | NEG_9348 | PI 36:2                       | Undefined                        |
| 593 | NEG_9309 | PI 36:5                       | Undefined                        |
| 594 | NEG_7403 | PMeOH 33:2 PMeOH 15:0_18:2    | Undefined                        |
| 595 | NEG_7602 | PMeOH 34:1 PMeOH 16:0_18:1    | Undefined                        |
| 596 | NEG_7576 | PMeOH 34:2 PMeOH 16:0_18:2    | Undefined                        |
| 597 | NEG_7555 | PMeOH 34:3 PMeOH 16:0_18:3    | Undefined                        |
| 598 | NEG_7528 | PMeOH 34:4 PMeOH 16:1_18:3    | Undefined                        |
| 599 | NEG_7835 | PMeOH 36:4 PMeOH 18:2_18:2    | Undefined                        |
| 600 | NEG_4016 | (-)-Podophyllotoxin           | Undefined                        |
| 601 | NEG_4603 | Polygalic acid                | Undefined                        |

|     |          |                                                                                    |                                         |
|-----|----------|------------------------------------------------------------------------------------|-----------------------------------------|
| 602 | NEG_4805 | Poricoic acid A                                                                    | Undefined                               |
| 603 | NEG_4906 | Protohypericin                                                                     | Undefined                               |
| 604 | NEG_3176 | Puerarin                                                                           | Phenylpropanoids and polyketides        |
| 605 | NEG_1469 | (R)-2-Hydroxystearic acid                                                          | Undefined                               |
| 606 | NEG_3615 | Roburic acid                                                                       | Undefined                               |
| 607 | NEG_2176 | (S)-7-Hydroxy-2-(4-hydroxyphenyl)-5-methoxy-8-(3-methylbut-2-en-1-yl)chroman-4-one | Phenylpropanoids and polyketides        |
| 608 | NEG_8680 | Saikosaponin a                                                                     | Undefined                               |
| 609 | NEG_9599 | Saikosaponin C                                                                     | Undefined                               |
| 610 | NEG_241  | Salicylic acid                                                                     | Benzenoids                              |
| 611 | NEG_9563 | Solasodine base + 2H, 1O, O-Hex-Hex-Hex                                            | Lipids and lipid-like molecules         |
| 612 | NEG_3447 | Sophoricoside                                                                      | Undefined                               |
| 613 | NEG_6579 | Spinosin                                                                           | Undefined                               |
| 614 | NEG_1298 | Stearic acid                                                                       | Lipids and lipid-like molecules         |
| 615 | NEG_2447 | Stenophylline A                                                                    | Organic oxygen compounds                |
| 616 | NEG_147  | Succinic acid                                                                      | Organic acids and derivatives           |
| 617 | NEG_2403 | Tetracosanoic acid                                                                 | Lipids and lipid-like molecules         |
| 618 | NEG_1998 | Trehalose                                                                          | Organic oxygen compounds                |
| 619 | NEG_2802 | Triamcinolone                                                                      | Lipids and lipid-like molecules         |
| 620 | NEG_5898 | Uridine-5'-diphosphate-glucose                                                     | Nucleosides, nucleotides, and analogues |
| 621 | NEG_244  | Urocanic acid                                                                      | Organoheterocyclic compounds            |
| 622 | NEG_3935 | Ursonic acid                                                                       | Undefined                               |
| 623 | NEG_4251 | Xyl(b1-6)Glc(b)-O-octyl                                                            | Lipids and lipid-like molecules         |
| 624 | NEG_1840 | (Z)-5,8,11-Trihydroxyoctadec-9-enoic acid                                          | Lipids and lipid-like molecules         |
